# Supplementary material for: Preparation of poly(ionic liquid@MOF) composite monolithic column and its application in the online enrichment and purification of tectochrysin in medicinal plants
Source: Royal Society of Chemistry journal article supplement (doi:10.1039/d1ay01954f), 2021-12-24
Supplement: d1ay01954f1.pdf [file d1ay01954f1.pdf]

## **Supplementary information**

### **Preparation of poly (ionic liquid@MOF) composite monolithic column and its application in on- line enrichment and purification of tectochrysin in medicinal plants**

Yamei Han, Shan Wang, Yijie Liu, Ligai Bai, Hongyuan Yan, Haiyan Liu\*

College of pharmacy, Key Laboratory of Public Health Safety of Hebei Province;  
Key Laboratory of Medicinal Chemistry and Molecular Diagnosis of Ministry of  
Education, Hebei University, Baoding, 071002, China

\* Corresponding author:

E-mail addresses: lhy1610@126.com (H. Y. Liu); Telephone: 86-312-5971107

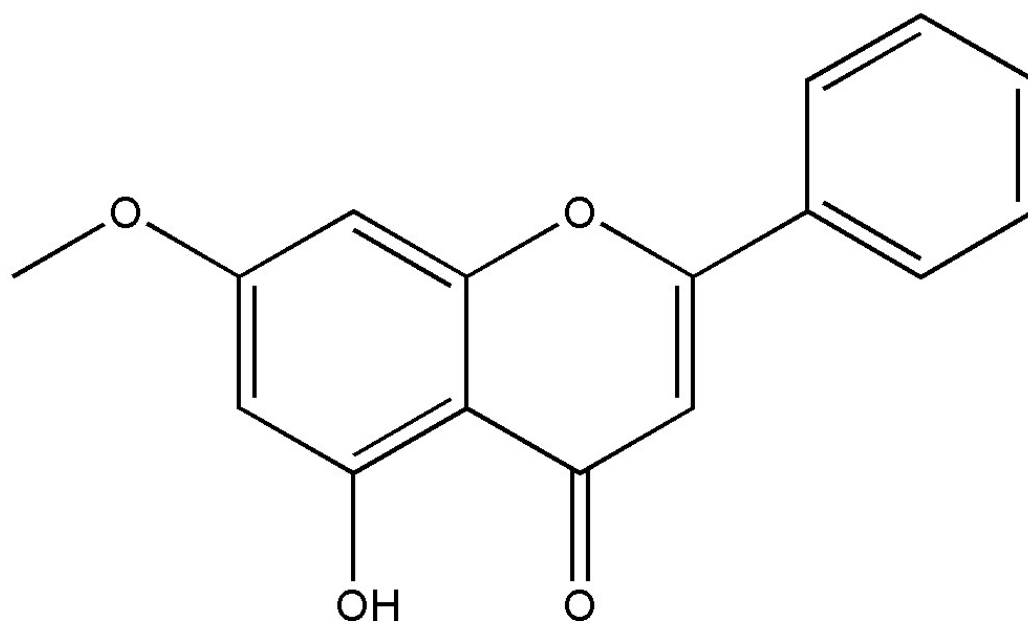

**Figure S1.** Structure of Tectochrysin

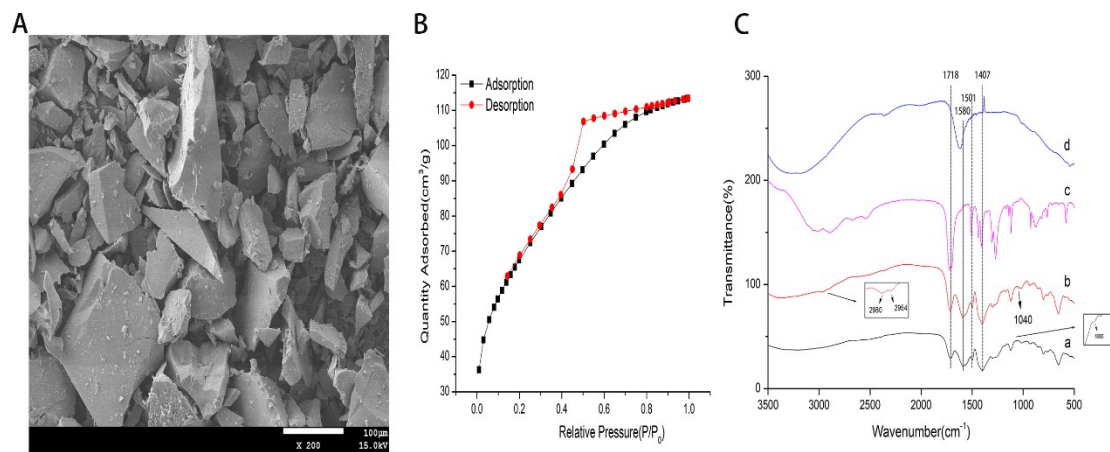

**Figure S2.** Characterization of UiO66-2COOH. (A) SEM images of UiO66-2COOH, (B) Nitrogen adsorption-desorption isotherms of UiO66-2COOH, (C) The FT-IR spectra of ZrCl<sub>4</sub> (d), Pyromellitic acid (c), the derivatized UiO66-2COOH (b) and UiO66-2COOH (a).

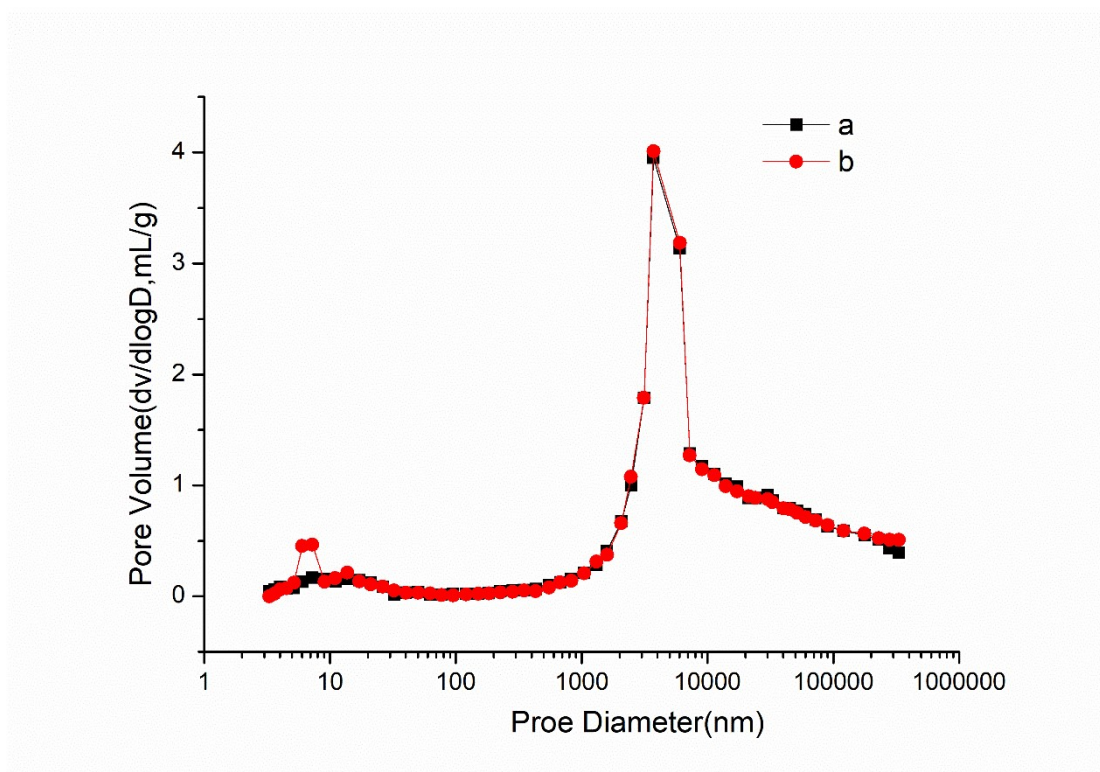

**Figure S3.** Pore size distribution of monolithic columns.

a: the poly (ionic liquid@MOF) composite monolithic column (the column M1 in Table 1); b: polymer monolithic column without MOF material added (the column M4 in Table 1)

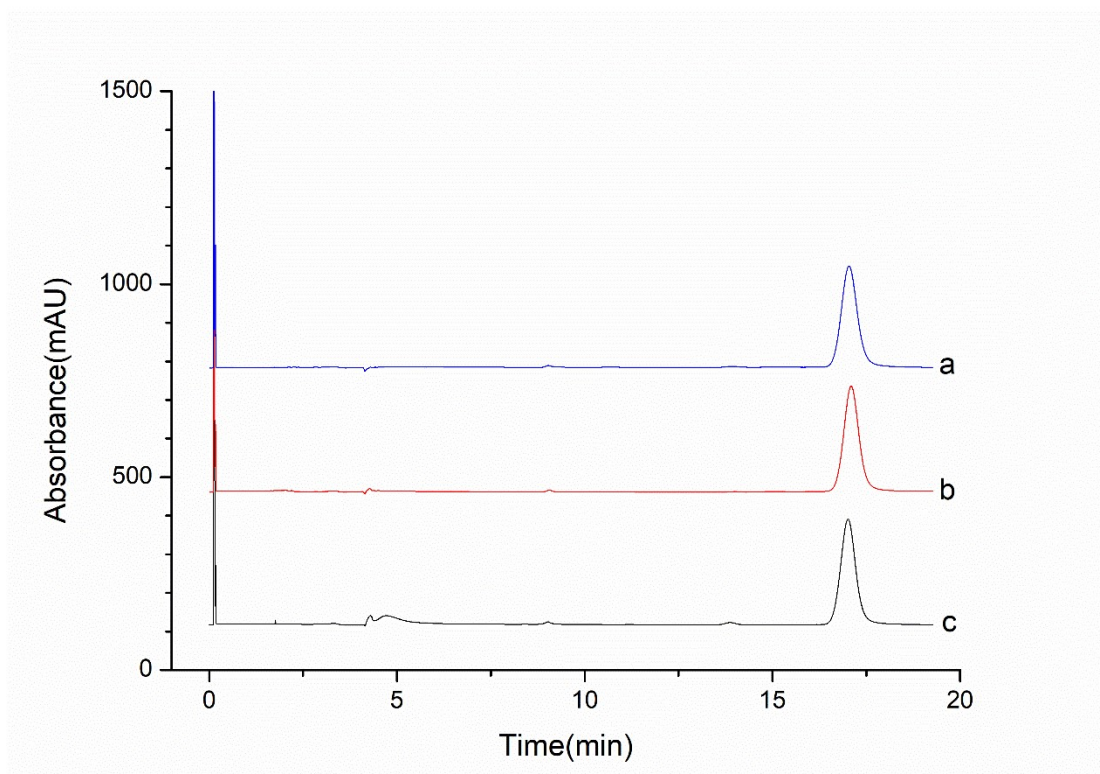

**Figure S4.** Elution plots after 1 (a), 100 (b) and 300 (c) uses of the poly (ionic liquid@MOF) composite monolithic column

Chromatographic conditions: The enrichment mobile phase was acetonitrile/water phosphate (20/80, v/v, pH4.5) and the elution mobile phase was acetonitrile/water phosphate (80/20, v/v, pH4.5); injection sample: 0.1 mg mL<sup>-1</sup> tectochrysin standard solution; flow rate: 1.0 mL min<sup>-1</sup>; injection volume: 20μL
